# Supplementary material for: Antioxidant and anticancer activities of supramolecularly controlled magnetostructural halo-oximes of lawsone
Source: Royal Society of Chemistry journal article supplement (doi:10.1039/c1nj20176j), 2011-01-01
Supplement: c1nj20176j.pdf [file c1nj20176j.pdf]

## Supplementary Information

### Antioxidant and anticancer activities of supramolecularly controlled magnetostructural halo-oximes of lawsone

Santosh B. Zaware<sup>a</sup>, Rajesh G. Gonnade<sup>b</sup>, Darbha Srinivas<sup>c</sup>, Ayesha Khan<sup>d</sup>,  
Sandhya Y. Rane<sup>\*a</sup>

This file replaces the previously published ESI file which contained incorrect CCDC deposition numbers.

### Results and discussion

#### *Crystal structure and supramolecular self-assembly*

**Table 1:** Crystallographic data for halo-lawsone oximes

| Compound                                                    | Chloro (1)                                                            | Bromo (2)                                                              | Iodo (3)                                                           |
|-------------------------------------------------------------|-----------------------------------------------------------------------|------------------------------------------------------------------------|--------------------------------------------------------------------|
| Empirical formula                                           | C <sub>10</sub> H <sub>6</sub> ClNO <sub>3</sub> ·0.5H <sub>2</sub> O | C <sub>10</sub> H <sub>6</sub> BrNO <sub>3</sub> ·0.63H <sub>2</sub> O | C <sub>10</sub> H <sub>6</sub> INO <sub>3</sub> ·2H <sub>2</sub> O |
| Formula weight                                              | 232.63                                                                | 278.07                                                                 | 351.09                                                             |
| Crystal system                                              | Orthorhombic                                                          | Orthorhombic                                                           | Monoclinic                                                         |
| Space group                                                 | <i>Pna</i> 2 <sub>1</sub>                                             | <i>Pna</i> 2 <sub>1</sub>                                              | <i>P</i> 2 <sub>1</sub> / <i>n</i>                                 |
| <i>a</i> (Å)                                                | 20.874(13)                                                            | 21.092(6)                                                              | 15.892(3)                                                          |
| <i>b</i> (Å)                                                | 20.426(12)                                                            | 20.588(6)                                                              | 4.5575(9)                                                          |
| <i>c</i> (Å)                                                | 4.638(3)                                                              | 4.6388(13)                                                             | 18.335(4)                                                          |
| β (°)                                                       | 90                                                                    | 90                                                                     | 110.667(3)                                                         |
| Volume (Å <sup>3</sup> )                                    | 1978(2)                                                               | 2014.3(10)                                                             | 1242.5(4)                                                          |
| Z                                                           | 8                                                                     | 8                                                                      | 4                                                                  |
| D <sub>calc</sub> (g cm <sup>-3</sup> )                     | 1.562                                                                 | 1.834                                                                  | 1.877                                                              |
| μ (mm <sup>-1</sup> )                                       | 0.376                                                                 | 4.073                                                                  | 2.586                                                              |
| F(000)                                                      | 952                                                                   | 1096                                                                   | 680                                                                |
| Crystal size (mm <sup>3</sup> )                             | 0.51 x 0.04 x 0.03                                                    | 0.56 x 0.08 x 0.06                                                     | 0.34 x 0.12 x 0.06                                                 |
| Ab. correction                                              | Multi-scan                                                            | Multi-scan                                                             | Multi-scan                                                         |
| T <sub>min</sub>                                            | 0.8312                                                                | 0.2088                                                                 | 0.4734                                                             |
| T <sub>max</sub>                                            | 0.9888                                                                | 0.7921                                                                 | 0.8603                                                             |
| <i>h</i> , <i>k</i> , <i>l</i> (min, max)                   | (-24, 24), (-24, 23),<br>(-5, 5)                                      | (-19, 25), (-24, 17),<br>(-5, 4)                                       | (-13, 18), (-5, 5),<br>(-21, 21)                                   |
| Reflns collected                                            | 13938                                                                 | 9724                                                                   | 5759                                                               |
| Unique reflns                                               | 3496                                                                  | 3437                                                                   | 2180                                                               |
| Observed reflns                                             | 2773                                                                  | 2925                                                                   | 2008                                                               |
| R <sub>int</sub>                                            | 0.0878                                                                | 0.0389                                                                 | 0.0231                                                             |
| No. of parameters                                           | 289                                                                   | 290                                                                    | 178                                                                |
| No. of restraints                                           | 4                                                                     | 15                                                                     | 8                                                                  |
| GoF on F <sup>2</sup>                                       | 1.160                                                                 | 1.050                                                                  | 1.048                                                              |
| R <sub>obs</sub>                                            | 0.0808                                                                | 0.0425                                                                 | 0.0258                                                             |
| wR <sub>2</sub> obs                                         | 0.1479                                                                | 0.0962                                                                 | 0.0645                                                             |
| R <sub>all</sub>                                            | 0.1048                                                                | 0.0543                                                                 | 0.0280                                                             |
| wR <sub>2</sub> all                                         | 0.1580                                                                | 0.1019                                                                 | 0.0660                                                             |
| Δρ <sub>max</sub> , Δρ <sub>min</sub> (e.Å <sup>-3</sup> ). | 0.354 and -0.271                                                      | 0.614 and -0.340                                                       | 0.556 and -0.264                                                   |
| CCDC deposition no                                          | 737076                                                                | 737077                                                                 | 737078                                                             |

The oxygen O4 in **1** and O5 in **2** of the water molecule accepts H-atom (H1A) from the oxime moiety and donates its H-atom to the carbonyl oxygen O3A of the next molecule A. The two adjacent molecules of A, which are bridged through water molecule, have almost perpendicular orientation in **1** as well as in **2** and same is the case with water molecule in **1**. Another chain formed by molecule A and oxygen O4 runs parallel to the earlier chains in **2**. In case of **1**, the oxime group (N1B-O1B-H1B) donates its H-atom (H1B) to the water oxygen O4 and carbonyl oxygen O3B makes bifurcated O-H...O hydrogen bond by accepting two H-atoms, H2A and H4B from molecule A and water molecule, respectively. The  $\pi\cdots\pi$  stacking between the two dissimilar rings resulted in the shifting of successive molecules along layer with the development of stepping in stacking of molecules. The adjacent layers of molecules A and B run in antiparallel fashion along the *c*-axis linked via longer but linear halogen bonding contact between the Cl1B atom and carbonyl oxygen O3A (Cl1B...O3A = 3.332 Å,  $\angle$ C3B-Cl1B...O3A = 156.2°) and weak C-H...Cl interactions involving C5A-H5A of molecule A and Cl1B of molecule B, thus forming bilayers. The neighbouring bilayers diagonal to the *ab*-plane are bridged through water molecule.

The geometries of the  $\pi\cdots\pi$  interaction in both the molecules of **1** are comparable with the inter-centroid distances being Cg...Cg = 3.588 Å (symmetry code: *x*, *y*, -1+*z*) and 3.495 Å (symmetry code: *x*, *y*, 1+*z*) for molecules A and B, respectively. The two rings make a dihedral angle of 1.23° (molecule A) and 1.66° (molecule B) and the corresponding perpendicular distances from the centroid of one ring to the plane of other and vice versa are 3.385 and 3.408 Å for molecule A and 3.435 and 3.438 Å for molecule B.

The geometries of the  $\pi\cdots\pi$  interaction in both the molecules of **2** are comparable with the inter-centroid distances being Cg...Cg = 3.512 Å (symmetry code: *x*, *y*, 1+*z*) and 3.617 Å (symmetry code: *x*, *y*, -1+*z*) for molecule A and B, respectively. The two rings make a dihedral angle of 1.39° (molecule A) and 1.22° (molecule B) and the corresponding perpendicular distances from the centroid of one ring to the plane of other are 3.457 and 3.458 Å for molecule A and 3.397 and 3.423 Å for molecule B. The  $\pi\cdots\pi$  stacking between the two dissimilar rings resulted in the shifting of successive molecules along layer with the development of stepping in stacking of molecules. The adjacent stacked layers of molecules A and B along the *c*-axis are stitched via halogen bonding contact involving Br1A and carbonyl oxygen O3B and weak C-H...Br contact between C5B-H5B of molecule B and Br1A of molecule A thus forming bilayers (Fig. 1).

The hydroxyl groups O1B-H1B and O2B-H2B donate their respective protons to the oxygen (O4 and O5) of the water molecules and carbonyl oxygen O3A. The C5B-H5B of the phenyl ring also makes almost linear C-H...Br contact with the bromine Br1A of molecule A. In turn, the atoms O2B, O3B and Br1A accept protons from the C5A-H5A, O5 and C8A-H8A to form C5A-H5A...O2B, O5...O3B and C8A-H8A...Br1B contacts.

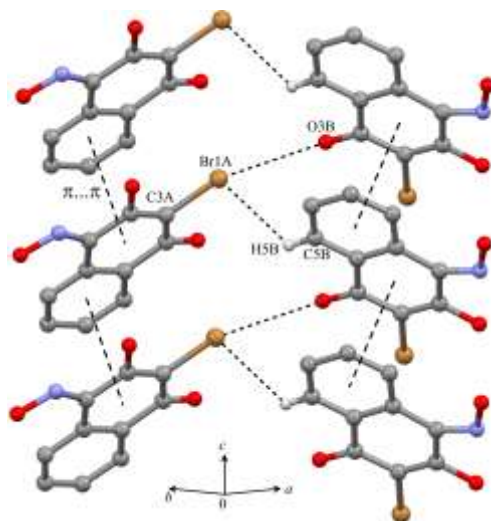

**Fig. 1.** Linking of molecules along the *c*-axis *via* halogen bonding and aromatic  $\pi\cdots\pi$  stacking interactions in **2**.

In case of **3** the geometry of the  $\pi\cdots\pi$  interaction is somewhat weak with the inter-centroid distances being  $\text{Cg}\cdots\text{Cg} = 4.136(2) \text{ \AA}$  (symmetry code:  $x, -1+y, z$ ). The two rings make a dihedral angle of  $2.53^\circ$  and the corresponding perpendicular distances from the centroid of one ring to the plane of other and vice versa are 3.554 and 3.595  $\text{\AA}$ . The hydroxyl group (O1-H1A) of the oxime moiety of the host molecules also donates its H-atom to oxygen O5 the other water molecule; in turn the water molecules O5 donates its H-atom (H5B) to the carbonyl oxygen O3 and accepts hydrogen atom H4B from the water molecule O4.

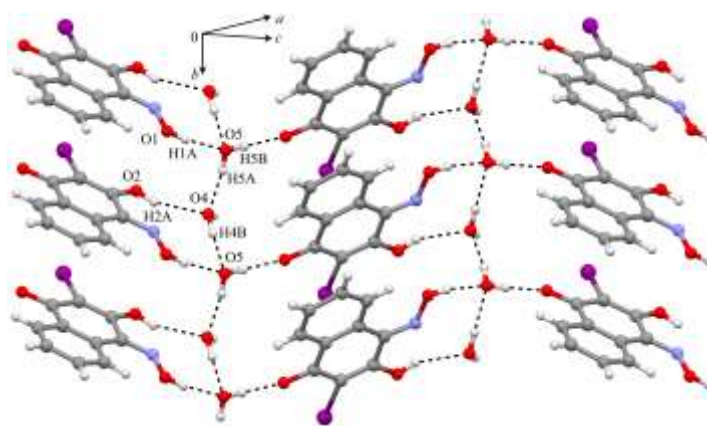

**Fig. 2.** Molecular packing viewed diagonal to *ac*-plane showing organization of the stacked layers of the host molecules through water molecules via O-H...O interactions in **3**.

Molecular packing in other direction revealed the stacking of host molecules to form layered arrangement. These stack layers are bridged through water molecules *via* O-H...O interactions; both the water molecules are arranged in the channel across the crystallographic  $2_1$ -screw axis connected together *via* O-H...O interactions and also stitching the stacked layers of host molecules (Fig. 2).

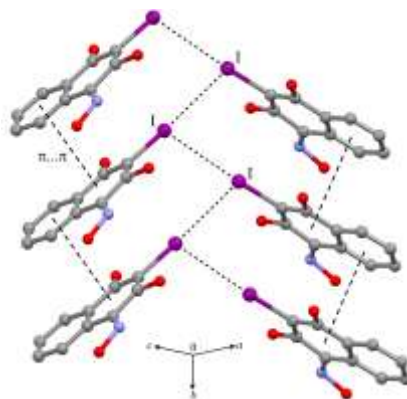

**Fig. 3.** Linking of molecules in **3** along the *c*-axis *via* short I...I contact and aromatic  $\pi$ ... $\pi$  stacking interactions.

**Table 2(a).** Geometrical parameters for intermolecular O-H...O interactions in **1**, Cl-LwOx [Å and deg.].

| D-H...A                | d(D-H)  | d(H...A) | d(D...A) | <(DHA) |
|------------------------|---------|----------|----------|--------|
| O(4)-H(4A)...Cl(1A)#1  | 0.82(5) | 2.87(7)  | 3.464(6) | 130(7) |
| C(8B)-H(8B)...Cl(1A)#2 | 0.93    | 2.83     | 3.607(7) | 141.6  |
| C(5B)-H(5B)...O(2A)#3  | 0.93    | 2.54     | 3.125(8) | 121.5  |
| C(5A)-H(5A)...Cl(1B)   | 0.93    | 2.91     | 3.564(7) | 128.9  |
| O(4)-H(9)...O(3A)#1    | 0.82(5) | 2.15(6)  | 2.861(8) | 144(9) |
| O(4)-H(4B)...O(3B)#4   | 0.84(6) | 2.25(5)  | 2.926(8) | 138(7) |
| O(1B)-H(1B)...O(4)#5   | 0.82    | 2.06     | 2.794(8) | 149.0  |
| O(2B)-H(2B)...O(1A)#5  | 0.82    | 2.34     | 3.051(7) | 144.9  |
| O(1A)-H(1A)...O(4)     | 0.82    | 2.10     | 2.754(8) | 136.5  |
| O(2A)-H(2A)...O(3B)#4  | 0.82    | 2.26     | 2.945(6) | 140.7  |

Symmetry transformations used to generate equivalent atoms:

#1 -x+3/2,y+1/2,z+1/2 #2 x-1/2,-y+1/2,z #3 -x+3/2,y-1/2,z+1/2 #4 -x+3/2,y+1/2,z-1/2 #5 -x+1,-y+1,z+1/2

**Table 2(b).** Geometrical parameters for intermolecular O-H...O interactions in **2**, Br-LwOx [Å and deg.].

| D-H...A               | d(D-H) | d(H...A) | d(D...A)  | <(DHA) |
|-----------------------|--------|----------|-----------|--------|
| O(1B)-H(1B)...O(5)    | 0.85   | 2.05     | 2.71(2)   | 134.9  |
| O(1B)-H(1B)...O(4)#1  | 0.85   | 2.07     | 2.818(8)  | 145.7  |
| O(1A)-H(1A)...O(5)#2  | 0.82   | 1.76     | 2.487(19) | 147.0  |
| O(1A)-H(1A)...O(4)#2  | 0.82   | 2.16     | 2.879(9)  | 146.2  |
| O(2B)-H(2B)...O(3A)#3 | 0.82   | 2.25     | 2.910(5)  | 138.1  |
| O(2A)-H(2A)...O(1B)#4 | 0.82   | 2.33     | 3.021(6)  | 142.8  |

Symmetry transformations used to generate equivalent atoms:

#1 x,y,z-1 #2 -x+1,-y+1,z-1/2 #3 -x+3/2,y-1/2,z-1/2 #4 -x+1,-y+1,z+1/2

**Table 2(c).** Geometrical parameters for intermolecular O-H...O interactions in **3** (I-LwOx) [Å and deg.].

| D-H...A             | d(D-H)    | d(H...A) | d(D...A) | <(DHA) |
|---------------------|-----------|----------|----------|--------|
| O(5)-H(5B)...O(3)#1 | 0.800(19) | 1.98(2)  | 2.775(4) | 172(4) |
| O(5)-H(5A)...O(4)#2 | 0.810(18) | 1.97(2)  | 2.764(4) | 169(4) |
| O(4)-H(4B)...O(5)#3 | 0.824(19) | 2.08(2)  | 2.883(4) | 166(4) |
| O(4)-H(4A)...O(2)#4 | 0.812(19) | 2.17(2)  | 2.949(4) | 160(4) |
| O(1)-H(1A)...O(5)#4 | 0.810(19) | 1.85(2)  | 2.648(3) | 167(4) |
| O(2)-H(2A)...O(4)#5 | 0.792(18) | 2.10(2)  | 2.815(4) | 151(4) |

Symmetry transformations used to generate equivalent atoms:

#1 -x+2,-y+1,-z+1 #2 -x+1,-y+2,-z+1 #3 -x+1,-y+1,-z+1 #4 -x+3/2,y+1/2,-z+1/2 #5 x+1/2,-y+3/2,z-1/2

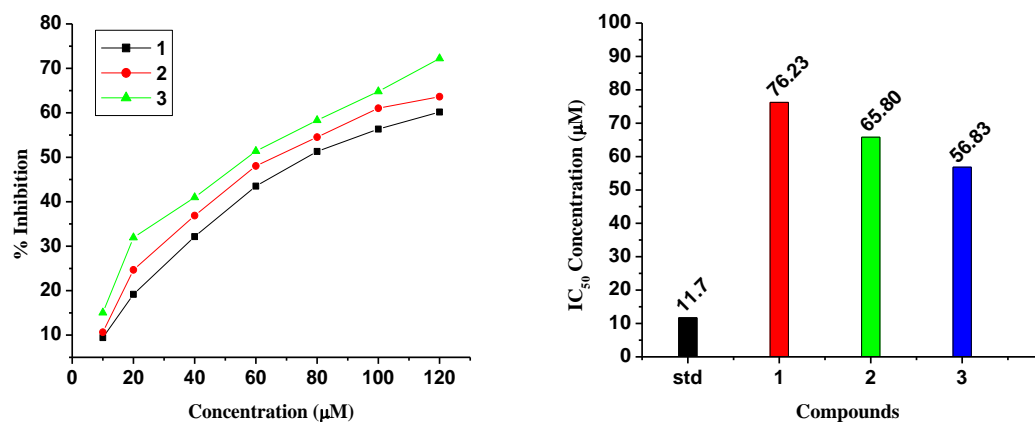

**Fig. 4:** DPPH chemical assay: (a) Scavenging of DPPH radical in terms of % Inhibition vs. conc. ( $\mu\text{M}$ ) (b)  $\text{IC}_{50}$  concentration ( $\mu\text{M}$ ) vs. compounds (Std, 1, 2 and 3).
